# Supplementary material for: Analysis of open chromatin regions in bladder cancer links β-catenin mutations and Wnt signaling with neuronal subtype of bladder cancer
Source: PubMed Central journal article supplement (PMC7596510; doi:10.1038/s41598-020-75688-0), 2020-10-29
Supplement: 41598_2020_75688_MOESM1_ESM.pdf [file 41598_2020_75688_MOESM1_ESM.pdf]

**Analysis of open chromatin regions in bladder cancer links  $\beta$ -catenin mutations  
and Wnt signaling with neuronal subtype of bladder cancer**

**Supplementary Information**

Aleyna Eray<sup>1,2</sup>, Perihan Yağmur Güneri<sup>1,2</sup>, Gülden Özden Yılmaz<sup>1</sup>, Gökhan Karakülah<sup>1,2</sup>, Serap Erkek<sup>1</sup>.

<sup>1</sup>Izmir Biomedicine and Genome Center, Inciralti 35340, Izmir, Turkey

<sup>2</sup> Dokuz Eylül University Izmir International Biomedicine and Genome Institute, Inciralti 35340, Izmir, Turkey

Manuscript correspondence:

Serap Erkek

Research Group Leader

(Epi)genomics of Cancer Group

Izmir Biomedicine and Genome Center

Dokuz Eylül University Health Campus

Mithatpaşa Caddesi No:58/5

35330 Balçova, İzmir, Turkey

Phone: +90(232) 299 41 67

**Supplementary Fig. S1.** Analysis of the DNA methylation levels in luminal outlier regulatory elements.

**Supplementary Fig. S2.** Kegg pathway analysis for the target genes of the luminal outlier regulatory elements.

**Supplementary Fig. S3.** HOMER de novo transcription factor motif analysis at the neuronal regulatory regions.

**Supplementary Fig. S4.** Correlation between the expression of  $\beta$ -catenin target genes NKD1 and NOTUM in neuronal and non-neuronal bladder cancer.

**Supplementary Fig. S5.** Expression of E-cadherin and N-cadherin and their relation to the expression of  $\beta$ -catenin targets in neuronal and non-neuronal bladder cancer.

**Supplementary Fig. S6.** Contingency tables of  $\beta$ -catenin mutation status of neuronal and non-neuronal bladder cancer samples.

**Supplementary Table S1.** The genes linked to the regulatory elements of the three clusters, corresponding peak names and their coordinates.

**Supplementary Table S2.** Chemotherapy drugs used for the treatment of samples and their TCGA subgroups.

**Supplementary Table S3.** Complete ChEA results reported by EnrichR program obtained for the target genes of neuronal regulatory elements.

**Supplementary Table S4.** Top 10 transcription factor motifs and their enrichments at neuronal regulatory elements as reported by HOMER.

**Supplementary Table S5.** Expression values of the  $\beta$ -catenin target genes in three different cohorts (TCGA, Iyer, Sjödal) and their corresponding molecular subgroups.

**Supplementary Table S6.** Functional annotation of the mutations identified for  $\beta$ -catenin destruction complex components in neuronal bladder cancer.

**Supplementary Table S7.** TCGA and Kamoun subgroup annotations for the 10 MIBC samples.

A

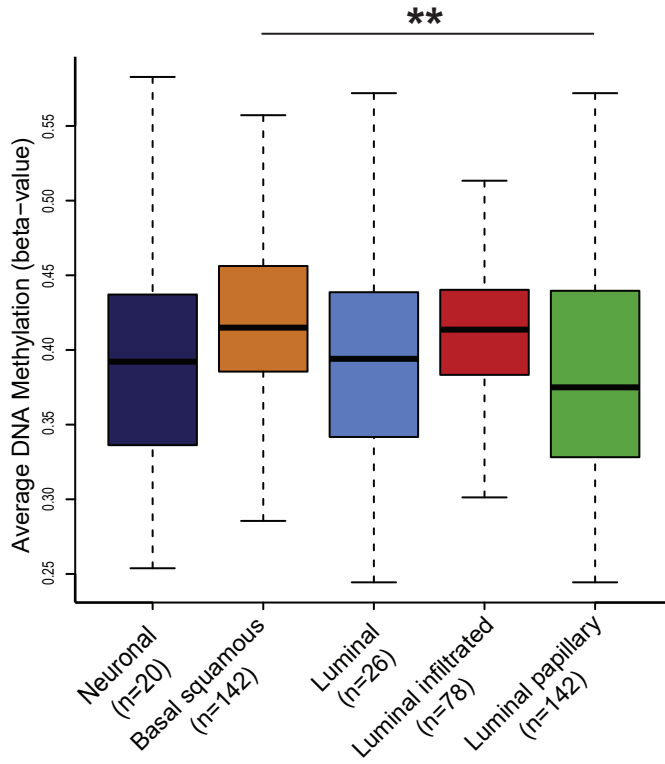

B

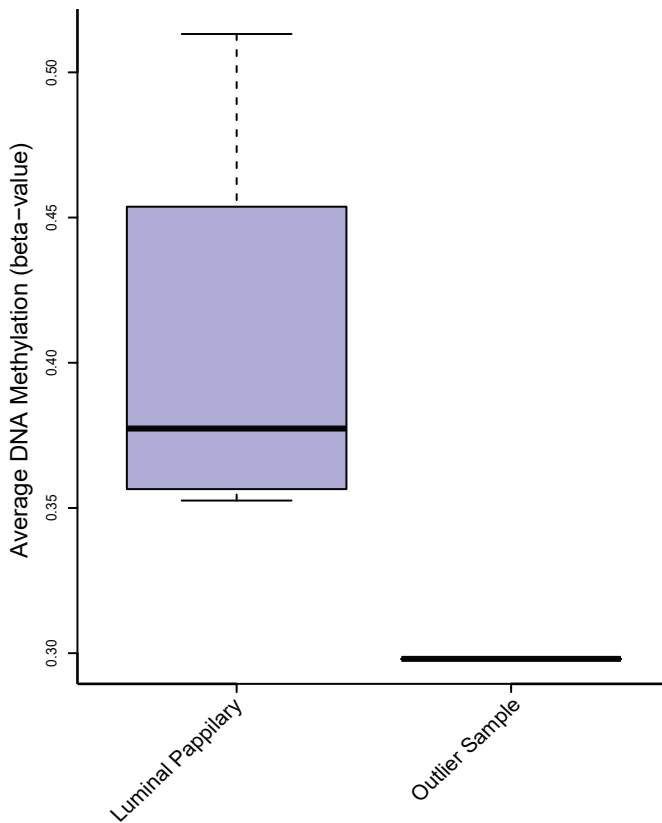

**Supplementary Fig. S1. Analysis of the DNA methylation levels in luminal outlier regulatory elements.** **a** Boxplot shows the DNA methylation levels (Beta values) of mRNA subgroups at the luminal outlier regulatory regions (cluster 3) (\* $p < 0.05$ ; \*\* $p < 0.01$ ; \*\*\* $p < 0.001$ ).

**b** Boxplot displays the DNA methylation levels of luminal outlier sample (n=1) and other luminal papillary samples (n=4) at the cluster 3 regulatory regions.

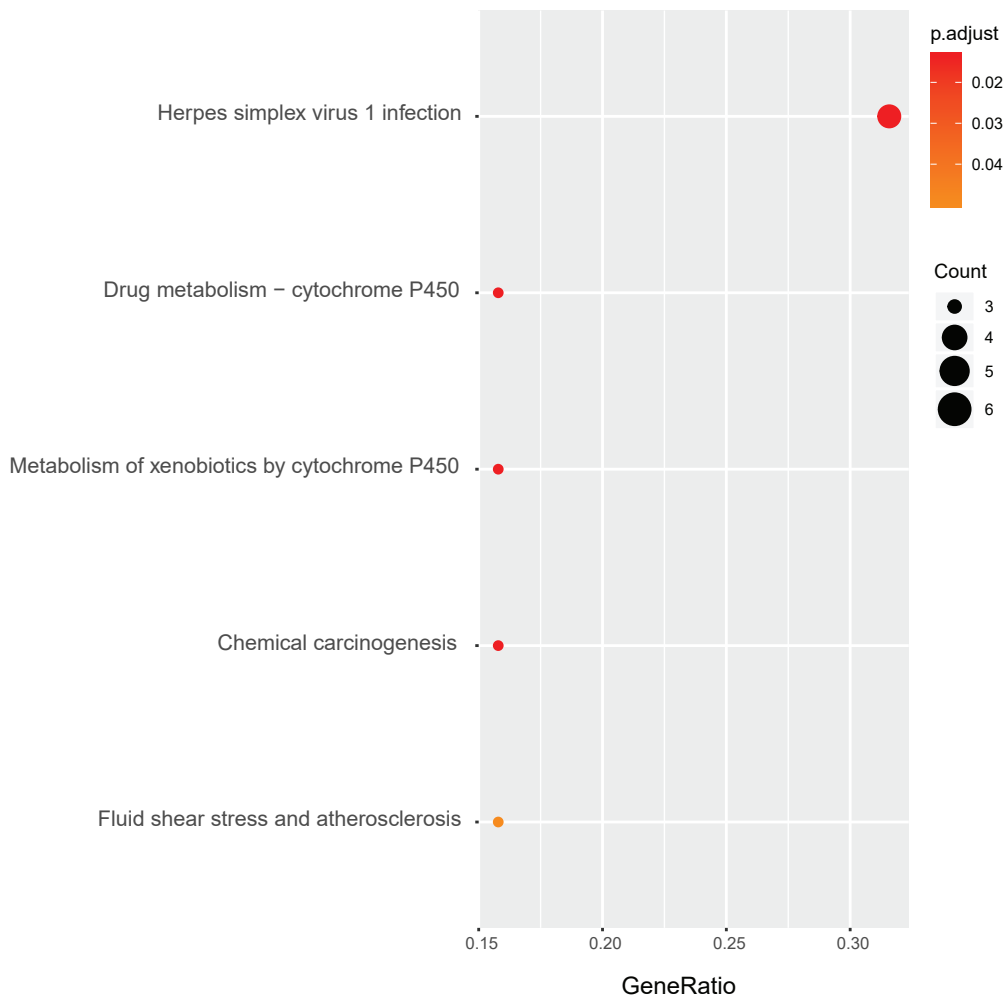

**Supplementary Fig. S2. Kegg pathway analysis for the target genes of the luminal outlier regulatory elements.** Dot sizes indicating gene counts of specific terms.

| Motif                                                                             | Transcription Factor | p-value |
|-----------------------------------------------------------------------------------|----------------------|---------|
|  | LEF1                 | 1e-690  |
|  | E2A                  | 1e-140  |
|  | Dlx2                 | 1e-137  |

**Supplementary Fig. S3. HOMER de novo transcription factor motif analysis at the neuronal regulatory regions.** Top three enriched motifs and best matched transcription factors are displayed.

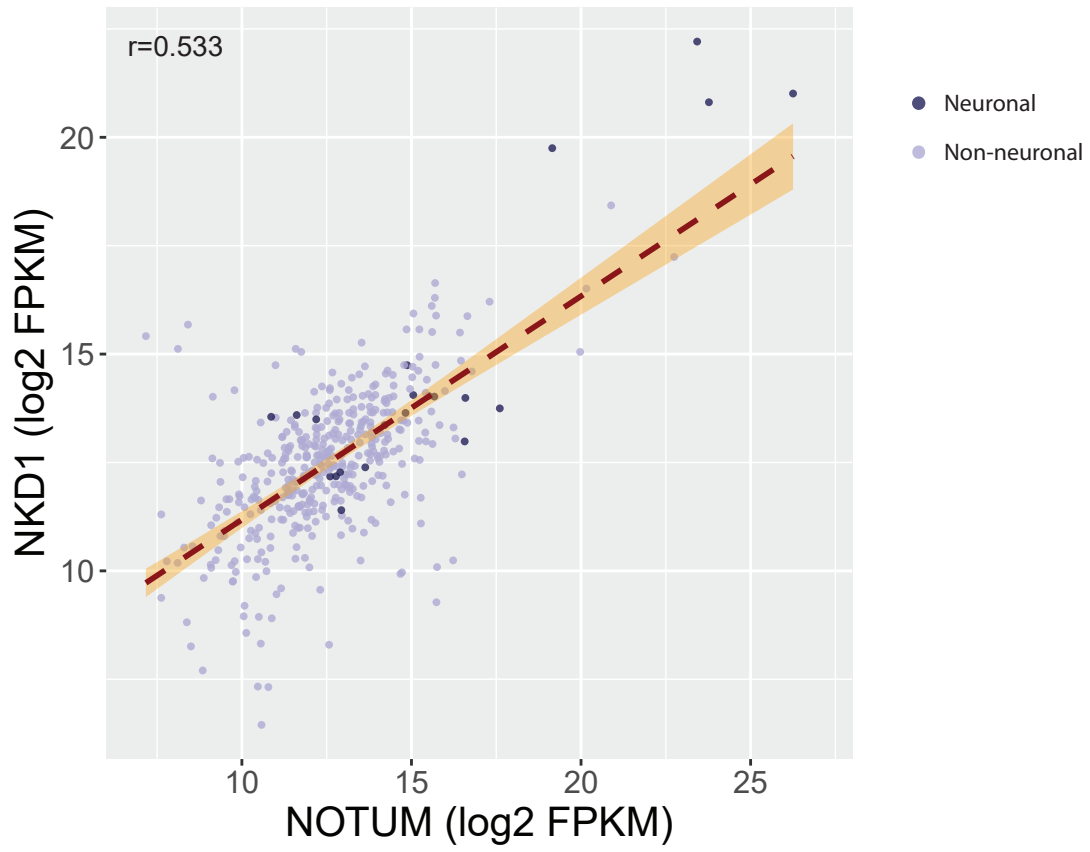

**Supplementary Fig. S4. Scatter plot showing the correlation between the expression of  $\beta$ -catenin target genes NKD1 and NOTUM. ( $r=0.53$ )**

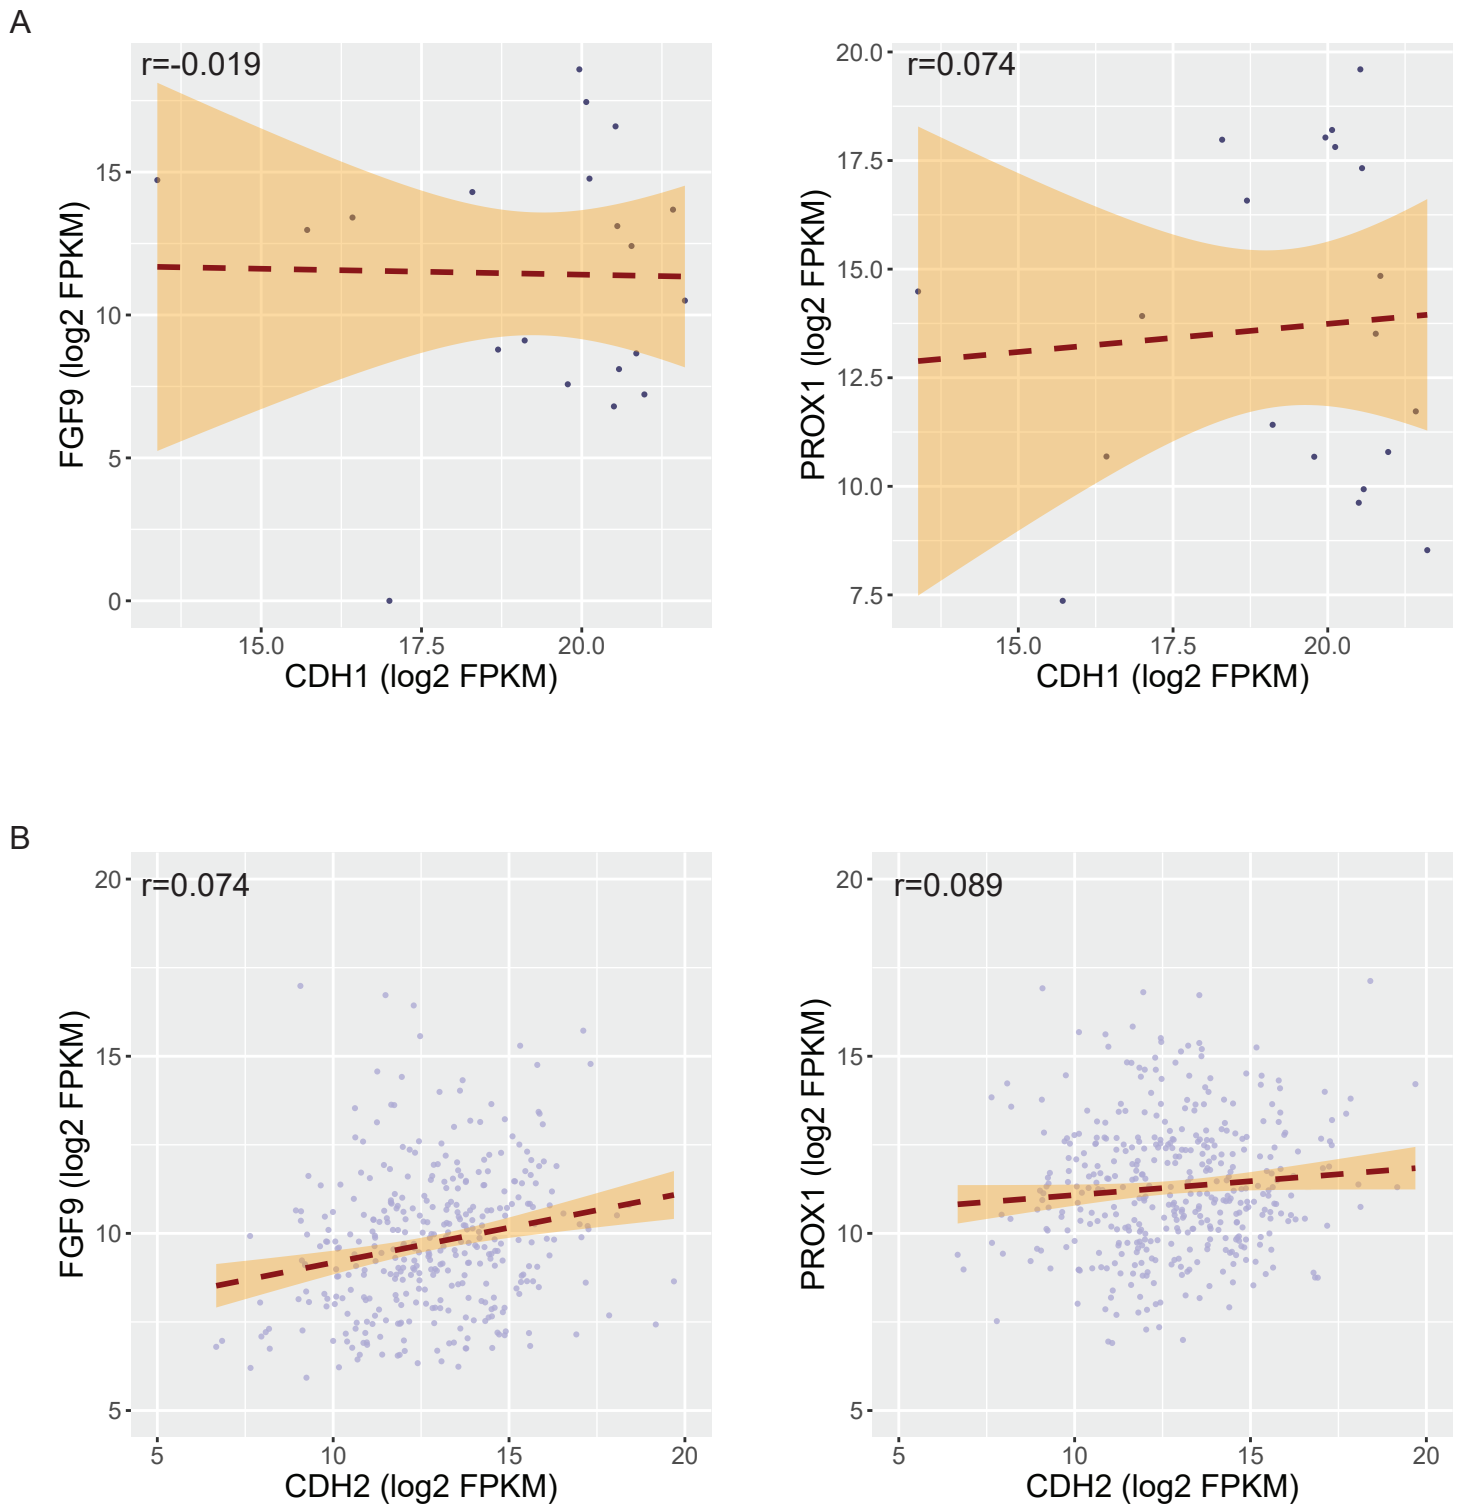

**Supplementary Fig. S5. Expression of E-cadherin and N-cadherin and their relation to the expression of  $\beta$ -catenin targets in neuronal and non-neuronal bladder cancer.** **a** Scatter plot compares the expression of E-cadherin with the expression FGF9 and PROX1 in neuronal bladder cancer. **b** Scatter plot compares the expression of N-cadherin with the expression FGF9 and PROX1 in non-neuronal bladder cancer.



A

| Group        | $\beta$ -catenin mutant | $\beta$ -catenin non-mutant |
|--------------|-------------------------|-----------------------------|
| Neuronal     | 5                       | 15                          |
| Non-neuronal | 17                      | 375                         |

B

| Group        | $\beta$ -catenin exon3 mutant | $\beta$ -catenin exon3 nonmutant |
|--------------|-------------------------------|----------------------------------|
| Neuronal     | 5                             | 15                               |
| Non-neuronal | 4                             | 388                              |

**Supplementary Fig. S6. Contingency tables of beta-catenin mutation and beta-catenin exon 3 mutation only.** The mutation status of the TCGA bladder cancer samples was determined through the cBioPortal database. **a** Table shows beta-catenin mutation status of TCGA bladder cancer samples. **b** Table shows beta-catenin exon 3 mutation status of the samples.
